# Supplementary material for: Optogenetic control of insulin secretion in intact pancreatic islets with β-cell-specific expression of Channelrhodopsin-2
Source: PubMed Central journal article supplement — Islets. 2014 Feb 18;6(1):e28095. doi: 10.4161/isl.28095 (PMC4593566; doi:10.4161/isl.28095), 2014-02-18
Supplement: isl-6-0-s01.pdf [file isl-6-0-s01.pdf]

## **Supplemental Material to:**

**Thomas M Reinbothe, Fatameh Safi, Annika S Axelsson,  
Inês G Mollet, Anders H Rosengren**

**Optogenetic control of insulin secretion in intact  
pancreatic islets with  $\beta$ -cell-specific expression of  
Channelrhodopsin-2**

**Islets 2014; Volume 6**

**<http://dx.doi.org/10.4161/isl.28095>**

**<https://www.landesbioscience.com/journals/islets/article/28095/>**

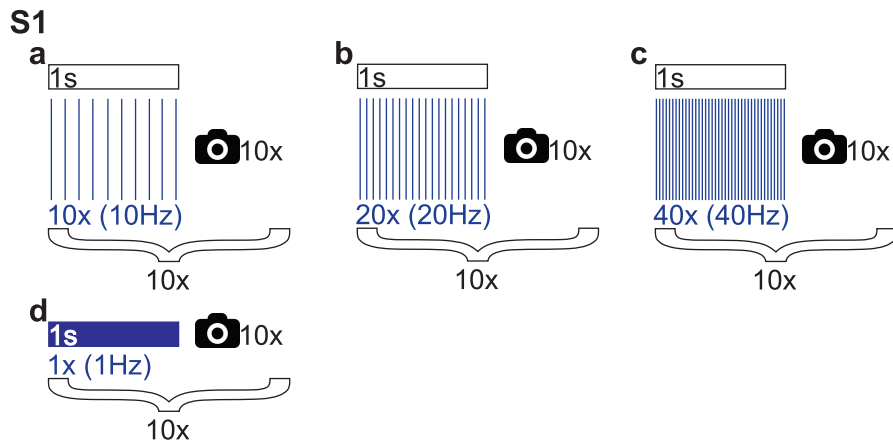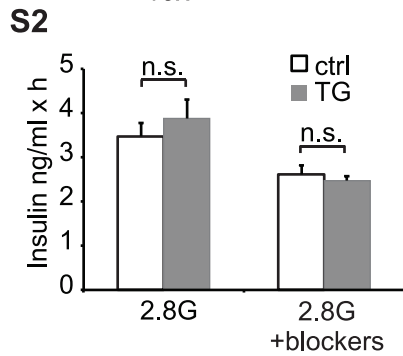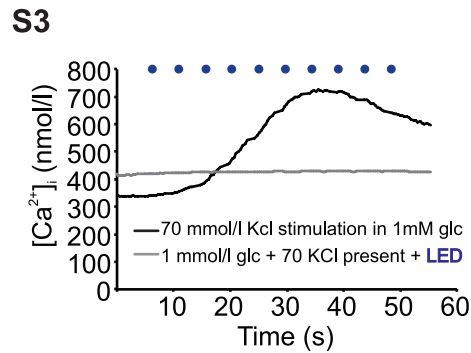

**Supplemental figures, S1:** Different light stimulation protocols used during calcium imaging experiments. The blue stripes indicate one blue LED light pulse that was either of 1 or 10 ms length. Each of the ten stimulation segments were 1 sec long and contained 10 (a), 20 (b), 40 (c) or one (d) light pulse(s). In between each 1 sec long segment 10 images were acquired.

**S2:** Insulin secretion from Chr2 (TG, grey bars) and control islets (white bars) at 2.8 mmol/l glucose  $\pm$ 1-h constant light stimulation  $\pm$ 5  $\mu$ mol/l isradipine and 100 nmol/l SNX-482 (blockers; n=8).

**S3:** Changes in intracellular calcium in islets incubated at 1 mmol/l glucose while 70 mmol/l KCl is perfused into the dish (black trace) and after 5 min (grey trace) in buffer of this composition + 1 s blue LED light pulses (blue dots) in between which ten images were acquired.

## Supplements
